# Supplementary material
Source: PubMed Central journal article supplement (PMC1809988)
Supplement: 15101419supp.pdf [file 15101419supp.pdf]

These are electronic appendices to the Biology Letter by Henderson & Snively 2004 *Tyrannosaurus* en pointe: allometry minimized rotational inertia of large carnivorous dinosaurs. *Proc. R. Soc. Lond. B (Suppl.)* **271**, S57–S60. (DOI 10.1098/rsbl.2003.0097.)

Electronic appendices are refereed with the text. However, no attempt has been made to impose a uniform editorial style on the electronic appendices.

### **Electronic Appendix A: Sources of illustrations for 3D body models.**

Currie, P.J. & Carpenter, K. 2000 A new specimen of *Acrocanthosaurus atokensis* (Theropoda, Dinosauria) from the Lower Cretaceous Antlers Formation (Lower Cretaceous, Aptian) of Oklahoma, USA. *Geodiversitas* **22**, 207-246.

Currie, P.J. and X.-J. Zhao. 1993 A new carnosaur (Dinosauria, Theropoda) from the Jurassic of Xinjiang, People's Republic of China. *Canadian Journal of Earth Sciences* **30**: 2037-2081.

Krebs, B. 1965 Die Triasfauna der Tessiner Kalkalpen. XIX. *Ticinosuchus ferox* nov. gen. nov. sp. *Schweizerische Paläontologische Abhandlungen* **81**. Basel, Birkhäuser Verlag,.

Novas, F. 1993 New information on the systematics and postcranial skeleton of *Herrerasaurus ischigualastensis* (Theropoda: Herrerasauridae) from the Ischigualasto Formation (Upper Triassic) of Argentina. *J. Vert. Paleont.* **13**, 400-423.

Ostrom, J.H. 1978 The osteology of *Compsognathus longipes*. *Zitteliana* **4**, 73-118.

Parrish, M.J. 1986 Locomotor adaptations in the hind limb and pelvis of the thecodontia. *Hunteria* **1**,2-35.

Paul, G.S. 1987 The science and art of restoring the life appearance of dinosaurs and their relatives: a rigorous how-to guide. In *Dinosaurs Past and Present Vol II* (ed. S.J. Czerkas & E.C. Olson), pp. 5-49. Natural History Museum of Los Angeles County and University of Washington Press, Seattle

Paul, G.S. 1988 *Predatory Dinosaurs of the World*. Simon & Schuster.

Russell, D.A. 1970 Tyrannosaurs of the Late Cretaceous of western Canada. *National Museum of Natural Sciences, Publications in Palaeontology* **1**,1-34, Ottawa.

Smith, H.M. 1946 *Handbook of Lizards* Ithaca, New York: Comstock Publishing Associates.

Welles, S.P. 1984 *Dilophosaurus wetherilli* (Dinosauria, Theropoda) osteology and comparisons. *Palaeontographica Abt. A.* **185**, 85-180.

Electronic Appendix B

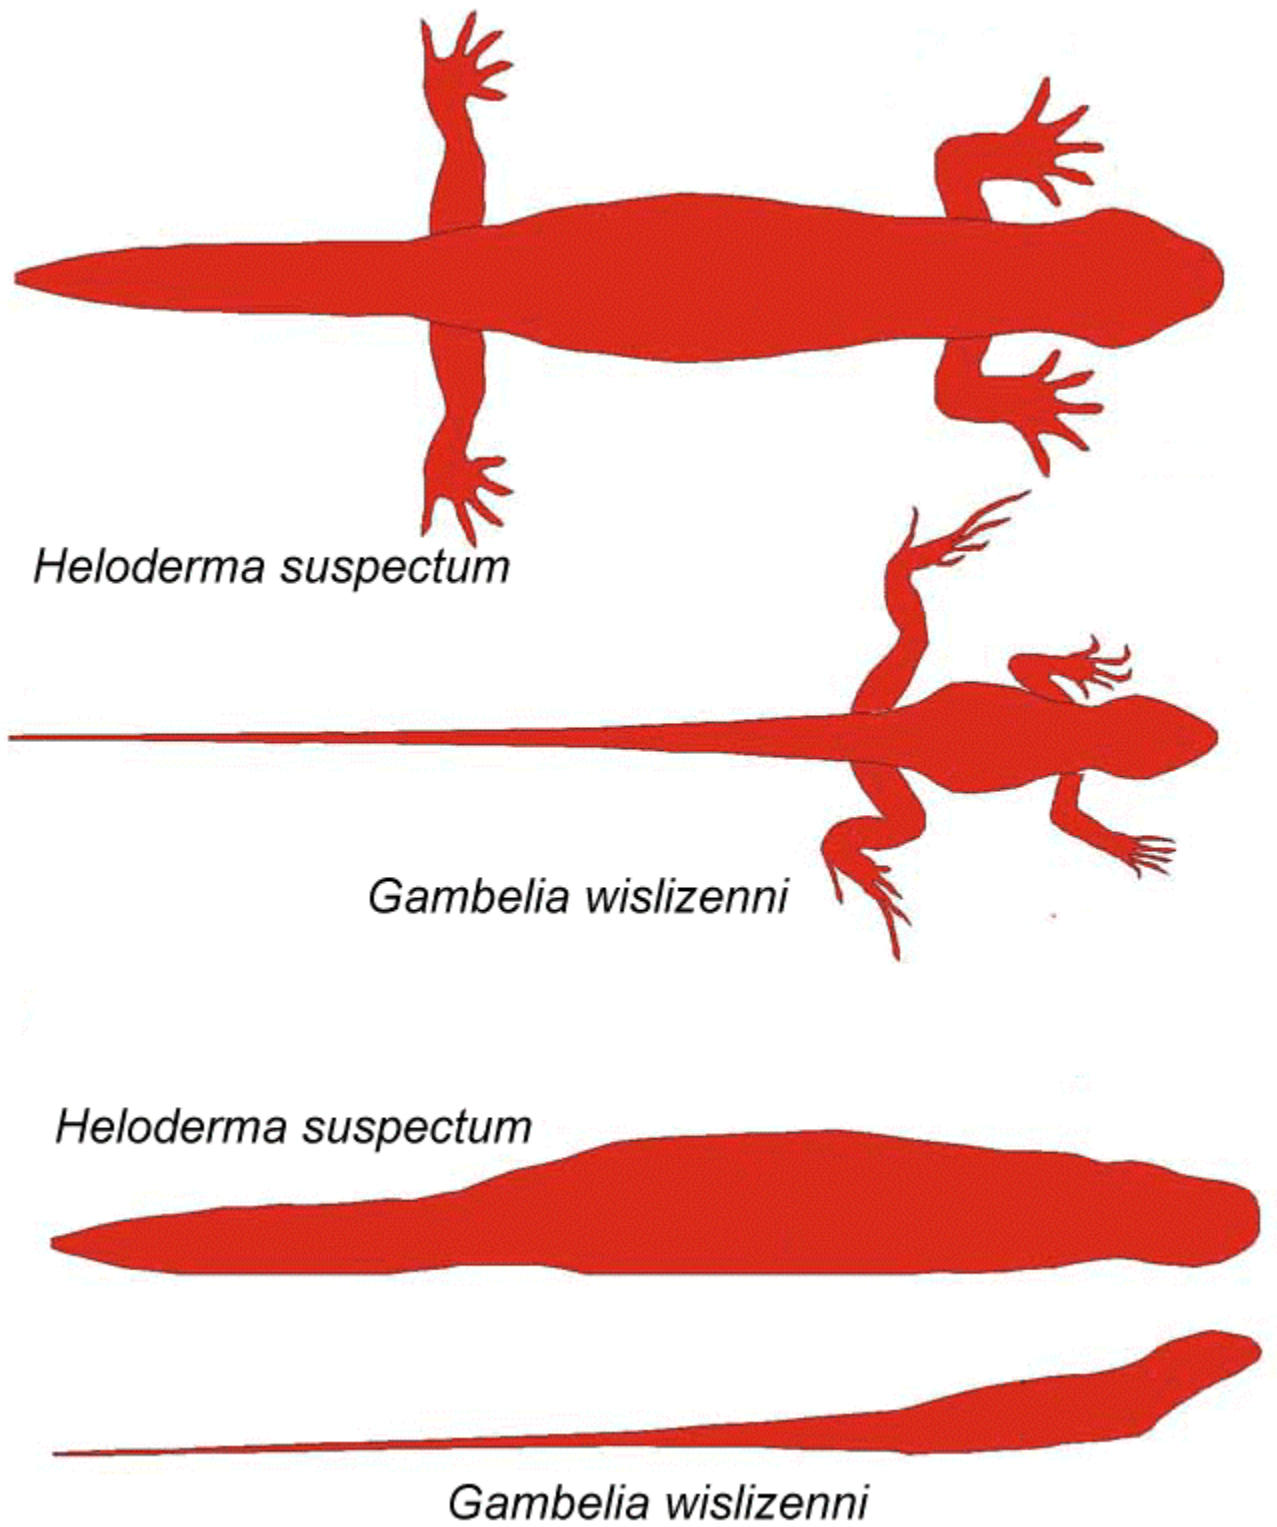

**Figure 3:** Lizard body shape discrepancies lead to great differences in length-normalized mass.
